# Supplementary material for: Bi-stable spin-crossover characteristics of a highly distorted [Fe(1-BPP-COOC2H5)2](ClO4)2·CH3CN complex
Source: Royal Society of Chemistry journal article supplement (doi:10.1039/c8dt04928a), 2019-01-01
Supplement: c8dt04928a1.pdf [file c8dt04928a1.pdf]

## Supporting Information

### Bi-stable spin-crossover characteristics of a highly-distorted [Fe(1-BPP- COOC<sub>2</sub>H<sub>5</sub>)<sub>2</sub>](ClO<sub>4</sub>)<sub>2</sub>·CH<sub>3</sub>CN complex

Kuppusamy Senthil Kumar,<sup>a\*</sup> Benoît Heinrich,<sup>a</sup> Sergi Vela,<sup>b</sup> Eufemio Moreno-Pineda,<sup>c</sup> Corinne Bailly,<sup>d</sup> and Mario Ruben<sup>a,c\*</sup>

<sup>a</sup>Institut de Physique et Chimie des Matériaux de Strasbourg (IPCMS), CNRS-Université de Strasbourg, 23, rue du Loess, BP 43, 67034 Strasbourg cedex 2, France.

<sup>b</sup>Laboratoire de Chimie Quantique, UMR 7111, CNRS-Université de Strasbourg, 4 rue Blaise Pascal, F-67000 Strasbourg, France.

<sup>c</sup>Institute of Nanotechnology, Karlsruhe Institute of Technology (KIT), Hermann-von-Helmholtz-Platz 1, 76344, Eggenstein-Leopoldshafen, Germany.

<sup>d</sup>Service de Radiocristallographie, Fédération de Chimie Le Bel FR2010 CNRS-Université de Strasbourg, 1 rue Blaise Pascal, BP 296/R8, 67008 Strasbourg cedex, France.

\*Email: [senthil.kuppusamy@ipcms.unistra.fr](mailto:senthil.kuppusamy@ipcms.unistra.fr); [mario.ruben@kit.edu](mailto:mario.ruben@kit.edu)

## Experimental

**Materials and methods:** Anhydrous solvents and  $\text{Fe}(\text{ClO}_4)_2 \cdot 6\text{H}_2\text{O}$  were purchased from commercial sources and used as received. Glassware are dried in a vacuum oven at  $150^\circ\text{C}$  prior to the experiments. The complexation reactions were performed under argon (Ar) atmosphere.

## Instrumentation

### X-ray crystallography

X-Ray diffraction data collection was carried out on a Bruker APEX II DUO Kappa-CCD diffractometer equipped with an Oxford Cryosystem liquid N<sub>2</sub> device, using Cu-K $\alpha$  radiation ( $\lambda = 1.54178 \text{ \AA}$ ). The crystal-detector distance was 40mm. The cell parameters were determined (APEX2 software) [1] from reflections taken from three sets of 20 frames, each at 10s exposure. The structure was solved by Direct methods using the program SHELXS-2014 [2]. The refinement and all further calculations were carried out using SHELXL-2014 [2]. The H-atoms were included in calculated positions and treated as riding atoms using SHELXL default parameters. The non-H atoms were refined anisotropically, using weighted full-matrix least-squares on F<sup>2</sup>. A semi-empirical absorption correction was applied using SADABS in APEX2 [1]; transmission factors:  $T_{\text{min}}/T_{\text{max}} = 0.5220/0.7528$ . The atoms O4, C28 and the hydrogens of C27 are disordered over two positions. The oxygen atoms O9, O10, O11, O12 from one counter-anion are disordered over two positions.

### Magnetic measurements

All herein reported magnetic measurements were performed on a MPMS-XL5 SQUID magnetometers (Quantum Design). For the standard magnetic measurement in the dark, the temperature dependent magnetization was recorded at  $B_{\text{DC}} = 0.1 \text{ T}$  external magnetic field. The temperature sweeping rate was  $1 \text{ K min}^{-1}$  and it was the same for the cooling and heating modes. Gelatine capsules were used as sample holders in the temperature range  $5 \leftrightarrow 300 \text{ K}$ . The diamagnetic corrections of the molar magnetic susceptibilities were applied using Pascal's constants.

## DSC and SAXS measurements

DSC measurements were performed with a TA Instruments DSCQ2000 instrument operated at a scanning rate of 2 and 8 K min<sup>-1</sup> with Liquid Nitrogen Cooling System (LNCS) on heating and on cooling. SAXS patterns were obtained with a linear monochromatic Cu K<sub>α1</sub> beam ( $\lambda = 1.5405 \text{ \AA}$ ) obtained using a sealed-tube generator equipped with a bent quartz monochromator and a curved Inel CPS 120 counter gas filled detector; periodicities up to 70 Å can be measured, and the sample temperature controlled to within  $\pm 0.01 \text{ }^\circ\text{C}$  from 20 to 200 °C. The sample was filled home-made sealed cells with aluminium windows and exposure times were of 6 hours.

**Synthesis of the complex 1:** Ligand, 1-bpp-COOEt, (0.058g, 0.2 mmol) was solubilized in 10 ml of ACN. To this [Fe(ClO<sub>4</sub>)<sub>2</sub>].6H<sub>2</sub>O (0.1 mmol) was added and the mixture was stirred at RT for 2 hrs under Ar atmosphere. The reaction mixture was filtered and portioned into test tubes followed by diffusion of ether over a period of 2-3 weeks yielded good quality crystals suitable for X-ray analysis.

**Characterization:** Yield of the complex: 40 mg (46%). Elemental analysis: calc for C<sub>28</sub>H<sub>26</sub>Cl<sub>2</sub>FeN<sub>10</sub>O<sub>12</sub>.CH<sub>3</sub>CN: C, 41.78; H, 3.39; N, 17.87. Found: C, 41.47, H, 3.38, N, 17.66. ESI-MS: calculated for C<sub>28</sub>H<sub>26</sub>ClFeN<sub>10</sub>O<sub>8</sub> [M+ClO<sub>4</sub>]<sup>+</sup>: 721.0968, found: 721.1034.

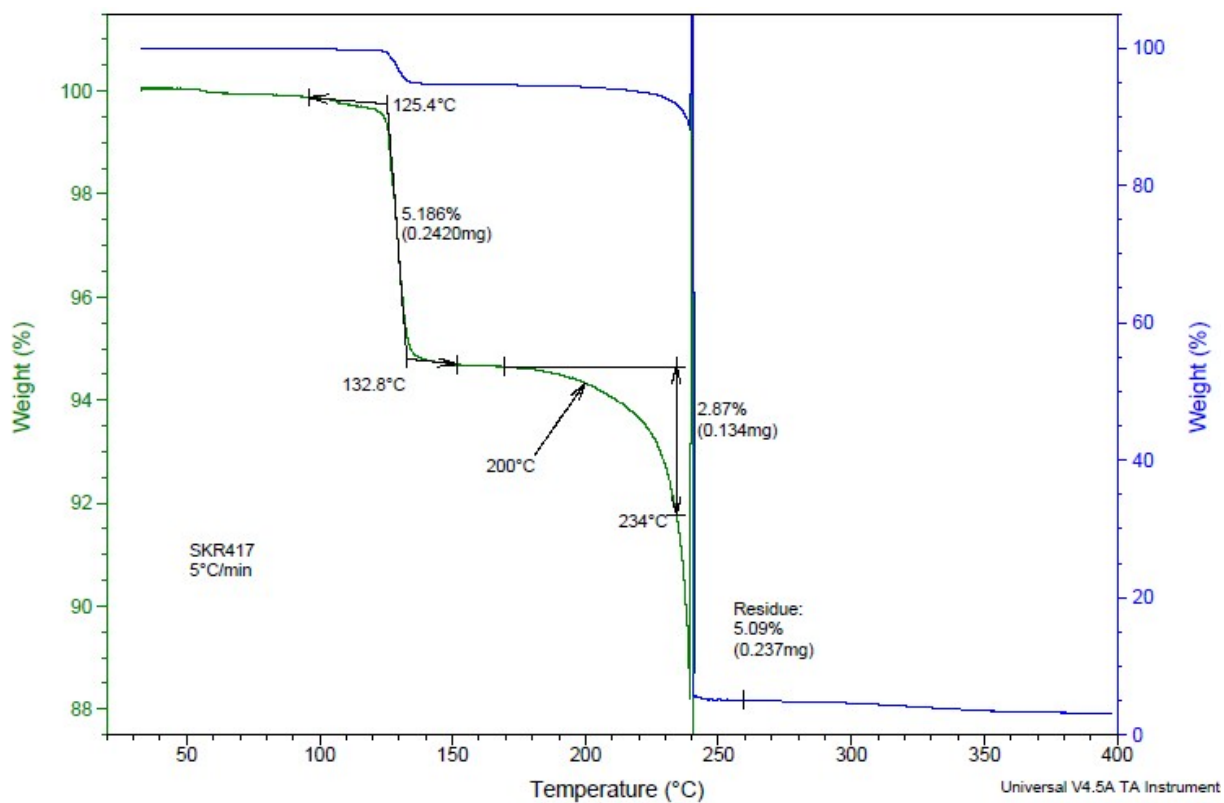

**Figure S1.** Thermogravimetric analysis (TGA) of the complex  $[\text{Fe}(\text{1-BPP COOC}_2\text{H}_5)_2](\text{ClO}_4)_2 \cdot \text{CH}_3\text{CN}$  (**1**) indicating loss of acetonitrile solvent molecule around  $125^{\circ}\text{C}$ . A 5.2% weight loss in the temperature range of  $125^{\circ}\text{C}$  -  $133^{\circ}\text{C}$  corresponds well with the 4.8% expected weight loss due to the loss of the acetonitrile solvent.

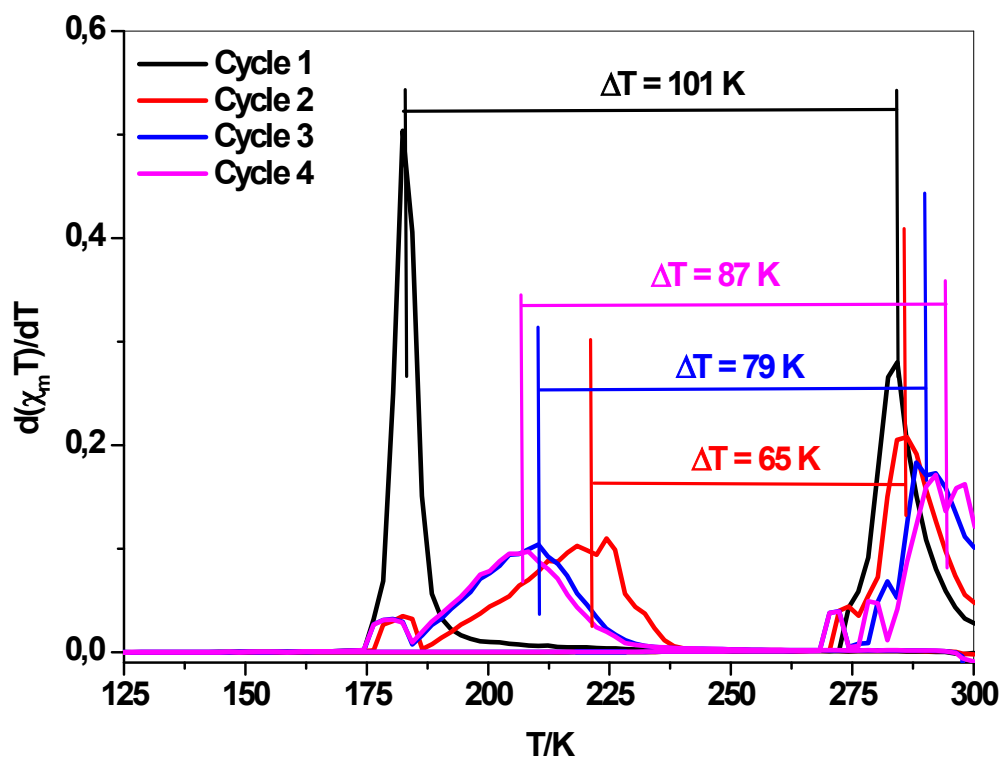

**Figure S2.** First derivative of the  $\chi T$  vs.  $T$  plots used to calculate the thermal hysteresis widths ( $\Delta T$ ).

**Table S1.** Parameters associated with the SCO transition of the complex  $[\text{Fe}(\text{1-BPP} - \text{COOC}_2\text{H}_5)_2](\text{ClO}_4)_2 \cdot \text{CH}_3\text{CN}$  (**1**).

| Cycle | $\chi_m T$ (HS)/ $\text{cm}^3\text{Kmol}^{-1}$ | $T_{1/2}/\text{K}$ | $\Delta T/\text{K}$ |
|-------|------------------------------------------------|--------------------|---------------------|
| 1     | 3.38                                           | 233                | 101                 |
| 2     | 3.24                                           | 254                | 65                  |
| 3     | 3.01                                           | 250                | 79                  |
| 4     | 2.87                                           | 251                | 87                  |

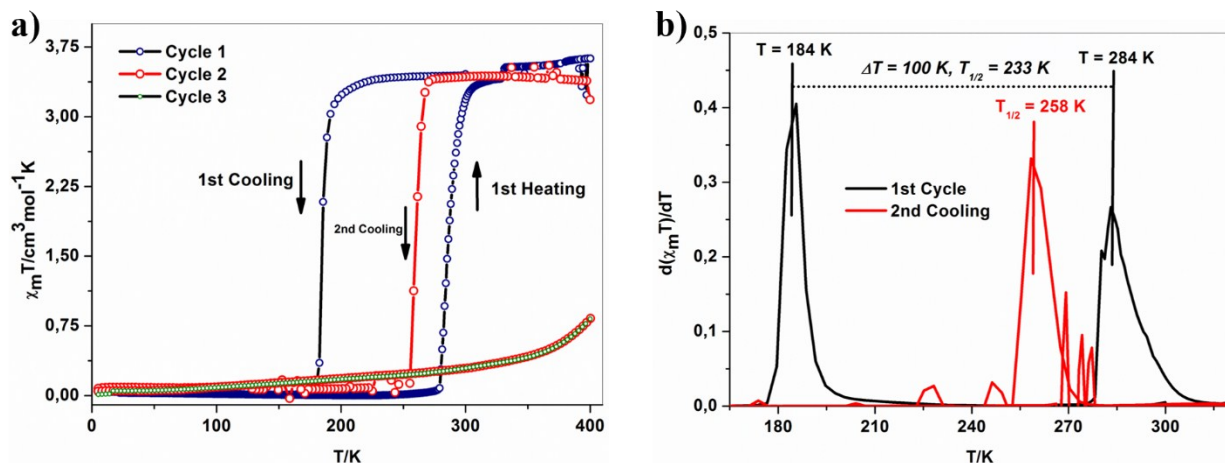

**Figure S3.** (a)  $\chi_m T$  vs.  $T$  plot of the freshly prepared complex **1**, first cooling of the sample was started at 300 K and (b) First derivative of the  $\chi_m T$  vs.  $T$  plots showing the measured thermal hysteresis width ( $\Delta T$ ) and  $T_{1/2}$  values.

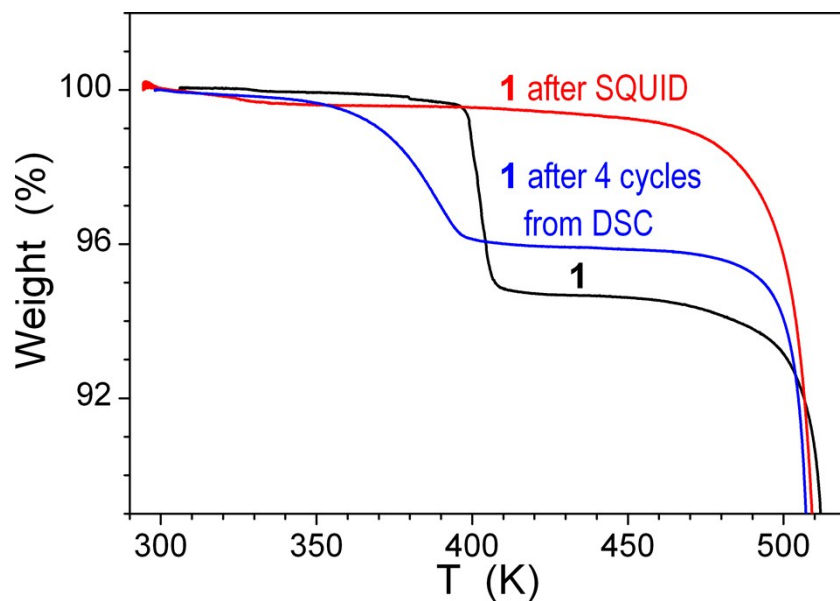

**Figure S4.** Comparison between the TGA of complex **1** before), after four cool-heat DSC cycles at 2K/min (blue) performed in the 143-323 K range, and after SQUID measurements (red) performed in the 5-400 K range. The two co-crystallized solvent molecules of the pristine complex are released at 398 K, while solvent gradually evaporates from 350 K after DSC cycles and is not present in the sample cycled up to 400 K with SQUID.

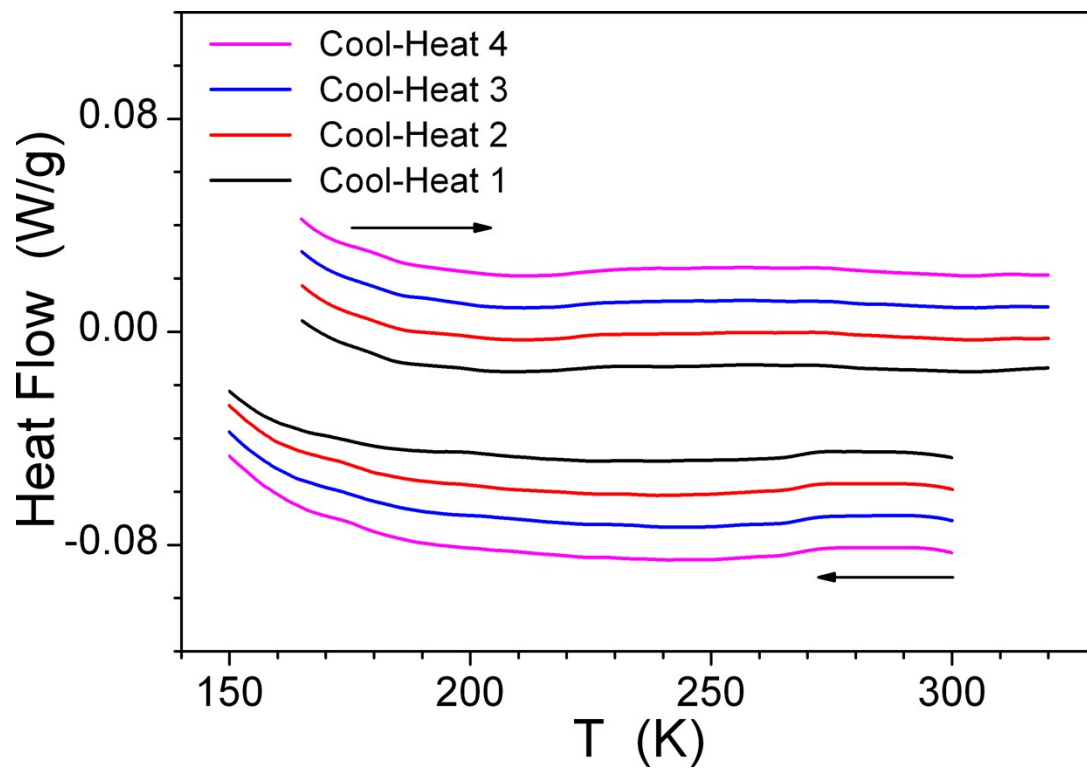

**Figure S5.** DSC analysis at 8 K/min of the complex **1** after SQUID measurements performed in the 5-400 K range (endotherm up).

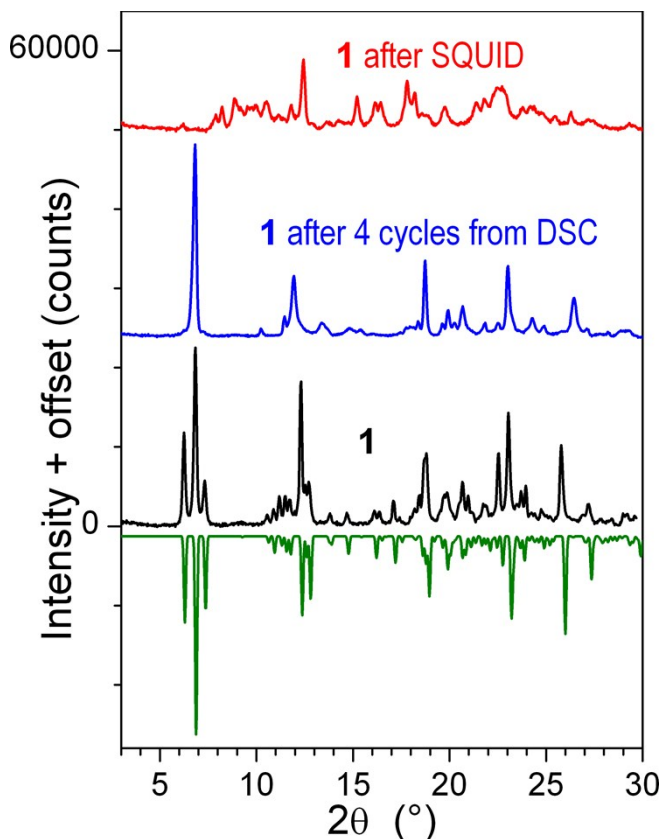

**Figure S6.** Powder X-ray diffraction patterns of complex **1** before (black), after four cool-heat DSC cycles at 2K/min (blue) performed in the 143-323 K range, and after SQUID measurements (red) performed by cycling the sample in the 5-400 K range. Note the excellent match between the crystalline sample used to perform SQUID measurements and the pattern simulated from the single crystal X-ray diffraction studies (green), and the change of structure after DSC and SQUID cool-heat cycles.

**Table S2.** Parameters obtained from DSC measurements. Average values obtained from the cool-heat cycles are reported for each cycle.

| Cycle | Scan rate = 2 K/min |              |              |              | Scan rate = 8 K/min |              |              |              |
|-------|---------------------|--------------|--------------|--------------|---------------------|--------------|--------------|--------------|
|       | $T_{1/2}^a$         | $\Delta T^a$ | $\Delta H^b$ | $\Delta S^c$ | $T_{1/2}^a$         | $\Delta T^a$ | $\Delta H^b$ | $\Delta S^c$ |
| 1     | 231                 | 104          | 7.15         | 32.35        | 230                 | 113          | 6.3          | 28.9         |
| 2     | 243                 | 86           | 7.2          | 30.58        | 244.5               | 89           | 6.25         | 26.32        |
| 3     | 241                 | 98           | 7.15         | 30.9         | 242                 | 98           | 6.1          | 26.19        |
| 4     | 240.5               | 103          | 7.15         | 31.11        | 239.5               | 103          | 6.1          | 26.68        |



<sup>a</sup> in K; <sup>b</sup> in kJ/mol; <sup>c</sup> in J/Kmol

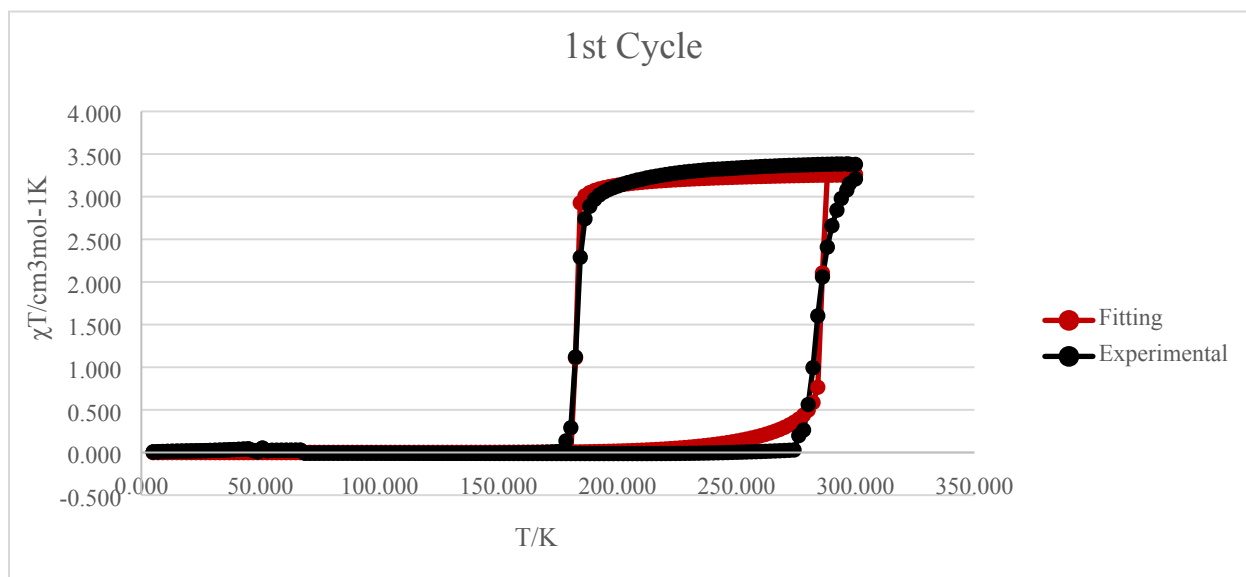

**Figure S7.** A fitting of the  $\chi T$  curve obtained in the first cycle, using the Slichter-Drickamer (SD) model. Black and red curves represent experimental and fitted curves, respectively.

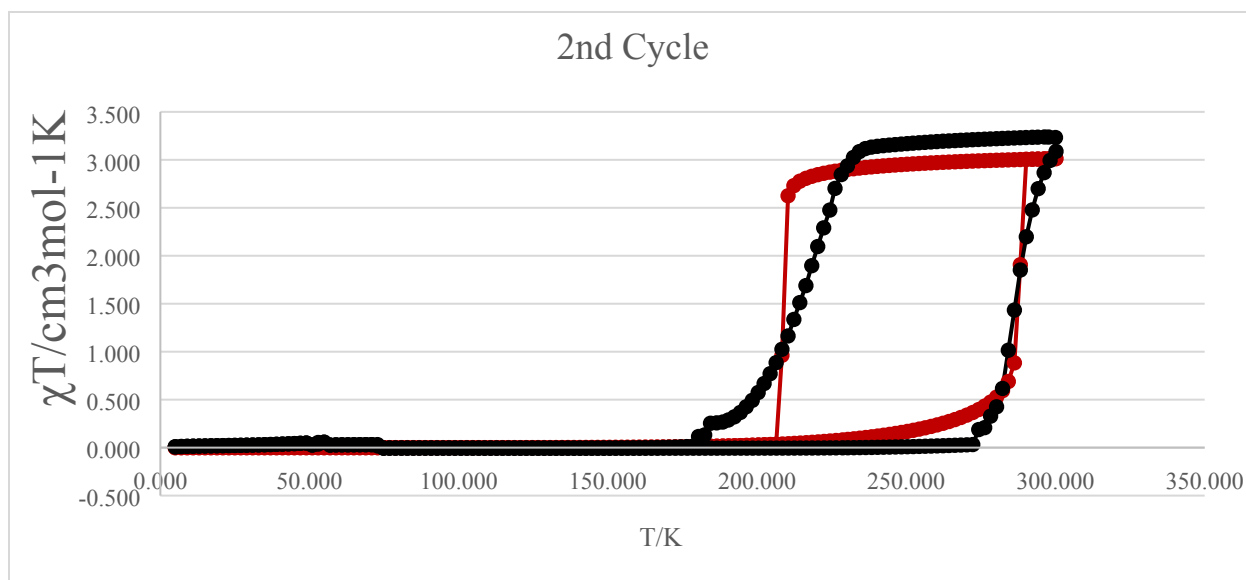

**Figure S8.** A fitting of the  $\chi T$  curve obtained in the second cycle, using the Slichter-Drickamer (SD) model. Black and red curves represent experimental and fitted curves, respectively.

**Table S3** Crystallographic data of the complex<sup>a</sup>

|                        |                                                                                   |                       |                |
|------------------------|-----------------------------------------------------------------------------------|-----------------------|----------------|
| Formula                | C <sub>30</sub> H <sub>29</sub> Cl <sub>2</sub> FeN <sub>11</sub> O <sub>12</sub> | V/Å <sup>3</sup>      | 1864.2 (4)     |
| FW/g.mol <sup>-1</sup> | 862.39                                                                            | Z                     | 2              |
| T/K                    | 253                                                                               | ρ/g.cm <sup>-3</sup>  | 1.536          |
| Crystal System         | Triclinic                                                                         | μ/mm <sup>-1</sup>    | 5.230          |
| Space group            | <i>P</i> - <i>1</i>                                                               | θ min-max/°           | 3.150 – 67.035 |
| <i>a</i> /Å            | 9.5859(13)                                                                        | Reflns collected      | 27020          |
| <i>b</i> /Å            | 13.8752(17)                                                                       | Indep Reflns          | 6492           |
| <i>c</i> /Å            | 15.248(2)                                                                         | Parameters            | 515            |
| α/°                    | 67.744 (7)                                                                        | GOF on F <sup>2</sup> | 1.068          |
| β/°                    | 83.316(8)                                                                         | R1                    | 0.0763         |
| γ/°                    | 87.620(8)                                                                         | wR2                   | 0.2390         |

<sup>a</sup> ccdc 1589139**References**

1. “M86-E01078 APEX2 User Manual”, Bruker AXS Inc., Madison, USA, 2006.
2. G. M. Sheldrick, *Acta Cryst.* 2008, **A64**, 112-122.
